# Supplementary material
Source: PubMed Central journal article supplement (PMC5408613)
Supplement: 10.1194_M075101_jlr.M075101-1.pdf [file 10.1194_M075101_jlr.M075101-1.pdf]

## ABCG1 regulates pulmonary surfactant metabolism in mice and men

Thomas Q. de A. Vallim<sup>1,2,3,4</sup>, Elinor Lee<sup>1,5</sup>, David J. Merriott<sup>2,\*</sup>, Christopher N. Goulbourne<sup>6</sup>, Joan Cheng<sup>2</sup>, Angela Cheng<sup>2</sup>, Ayelet Gonen<sup>7</sup>, Ryan M. Allen<sup>8,#</sup>, Elisa N.D. Palladino<sup>8,9</sup>, David A. Ford<sup>8,9</sup>, Tisha Wang<sup>1,5</sup>, Ángel Baldán<sup>8</sup>, and Elizabeth J. Tarling<sup>1,3,4</sup>

Running Title: Dissecting the Pulmonary Lipidosis of *Abcg1*<sup>-/-</sup> Mice

### Supplemental Data

#### Supplemental Table S1. Characteristics of PAP patients.

| Patient Characteristics | Cohort |
|-------------------------|--------|
| Number of subjects      | 7      |
| Males                   | 6      |
| Females                 | 1      |
| White                   | 4      |
| African-American        | 1      |
| Hispanic                | 2      |
| Median Age (yr)         |        |
| Male                    | 46.5   |
| Female                  | 50     |

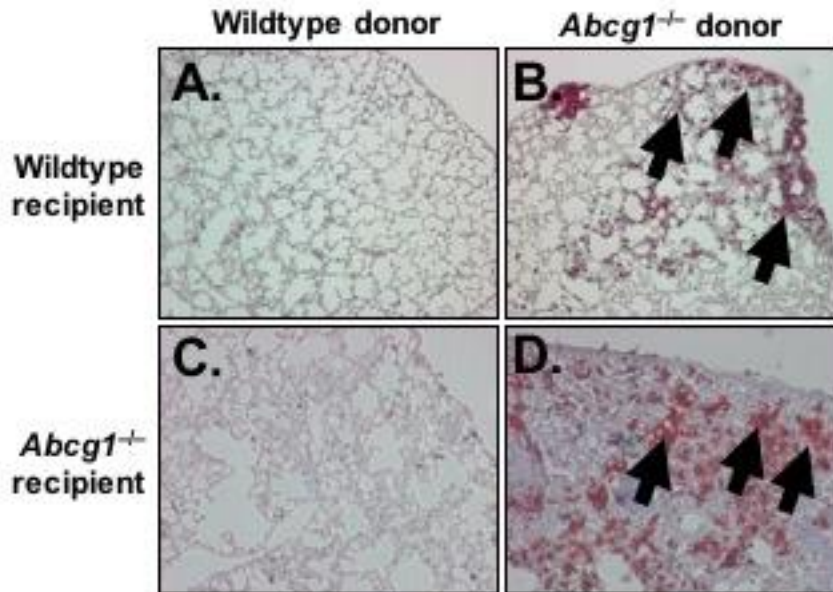

**Supplemental Figure S1.** (A-D) Frozen lung sections (10  $\mu$ M) from mice treated as in Figure 1 were stained with Oil red O to identify neutral lipids. Arrows indicate positively stained areas. (A) *Abcg1*<sup>+/+</sup> donor bone marrow (BM)  $\rightarrow$  *Abcg1*<sup>+/+</sup> recipient mice. (B) *Abcg1*<sup>-/-</sup> donor bone marrow (BM)  $\rightarrow$  *Abcg1*<sup>+/+</sup> recipient mice. (C) *Abcg1*<sup>+/+</sup> donor bone marrow (BM)  $\rightarrow$  *Abcg1*<sup>-/-</sup> recipient mice. (D) *Abcg1*<sup>-/-</sup> donor bone marrow (BM)  $\rightarrow$  *Abcg1*<sup>-/-</sup> recipient mice.

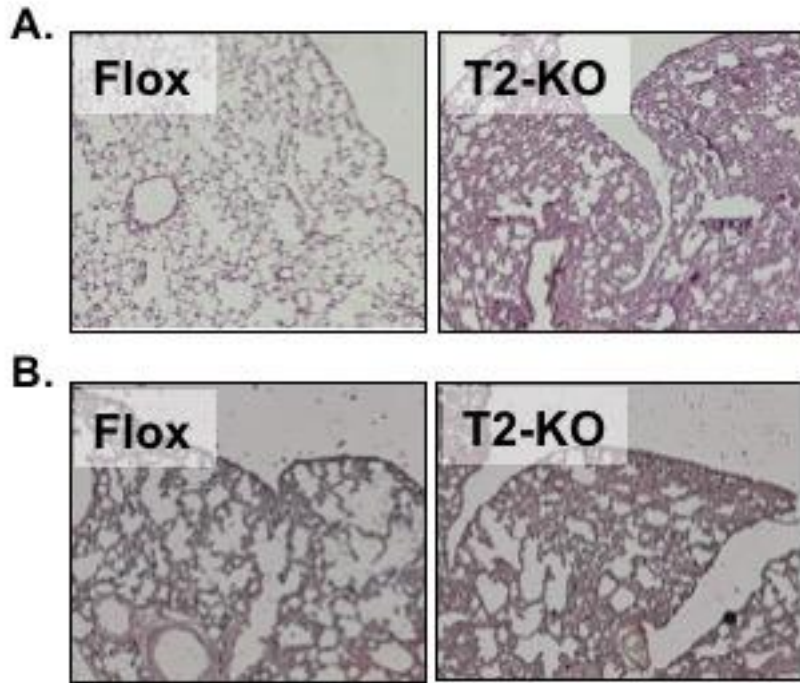

**Supplemental Figure S2.** Frozen lung sections (10  $\mu$ M) from *Abcg1<sup>f/f</sup>* (Flox) and *Abcg1<sup>T2-KO</sup>* (T2-KO) mice were stained with hematoxylin and eosin (**A**) or Oil red O (**B**).

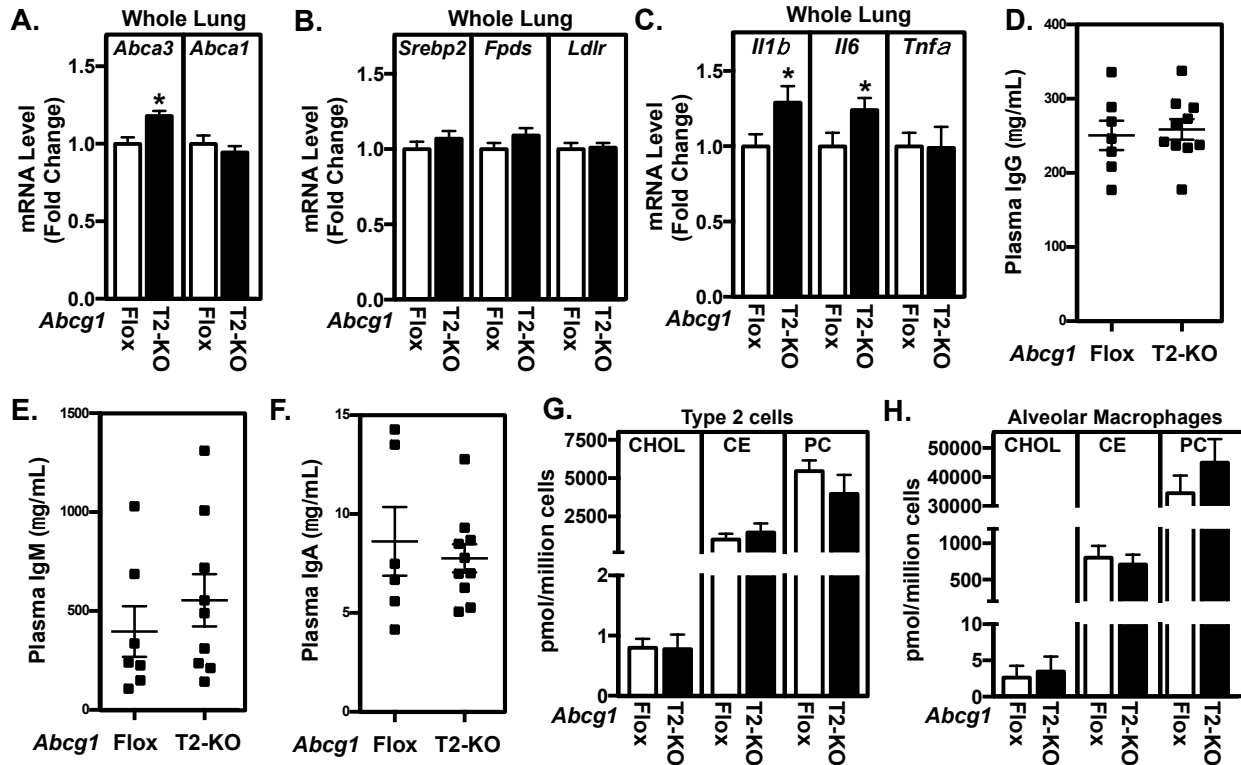

**Supplemental Figure S3.** (A-C) Whole lung mRNA expression of (A) *Abca1* and *Abca3*, (B) *Srebp-2*, *Fdps*, and *Ldlr*, and (C) *Il1 $\beta$* , *Il6*, and *Tnfa* in *Abcg1<sup>fl/fl</sup>* (Flox) and *Abcg1<sup>T2-KO</sup>* (T2-KO) mice. Gene expression was normalized to 36B4 and presented as fold change. Data are expressed as mean mRNA level  $\pm$ SEM ( $n = 4-6$  mice/genotype). (D-F) Plasma was diluted 1:250-1:1000 and tested for binding to IgG (D), IgM (E) and IgA (F). HRP-conjugated antibodies were used for detection. Data are presented as mean antibody titer (ng/mL)  $\pm$ SEM ( $n = 3-6$  mice/genotype). (G-H) Cholesterol, cholesteryl ester, phosphatidylcholine and their derivatives were quantified by ESI-MS/MS in T2 cells (G) and alveolar macrophages (H) from *Abcg1<sup>fl/fl</sup>* and *Abcg1<sup>T2-KO</sup>* mice. Data are presented as mean lipid level (pmol/million cells)  $\pm$ SEM ( $n = 3-6$  mice/genotype). Significance was measured by Student's *t* test. \*  $p < 0.05$ .

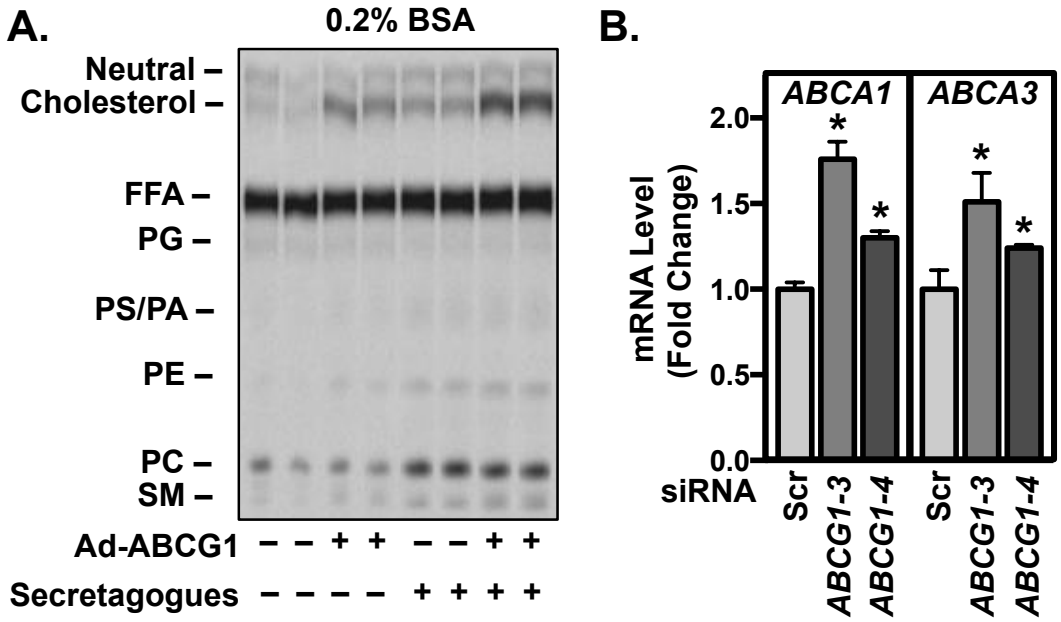

**Supplemental Figure S4.** (A) A549 T2 cells were infected as in Figure 4. Cells were pulse labeled with  $^{14}\text{C}$ -acetate for 4 h, followed by a 2 h chase in media containing 0.2% BSA in the presence or absence of a secretagogue cocktail (100  $\mu\text{M}$  ATP, 0.1  $\mu\text{M}$  phorbol-12-myristate-13-acetate, 20  $\mu\text{M}$  terbutaline). Total secreted lipids were extracted from the media and separated by thin layer chromatography to determine the levels of phospholipids. (B) Increased *ABCA3* and *ABCA1* expression in A549 cells treated with *ABCG1* siRNA. Data are presented as mean  $\pm$ SEM ( $n = 6$  replicates/condition). Significance was measured by one-way ANOVA followed by Bonferroni correction. \*  $p < 0.05$ .

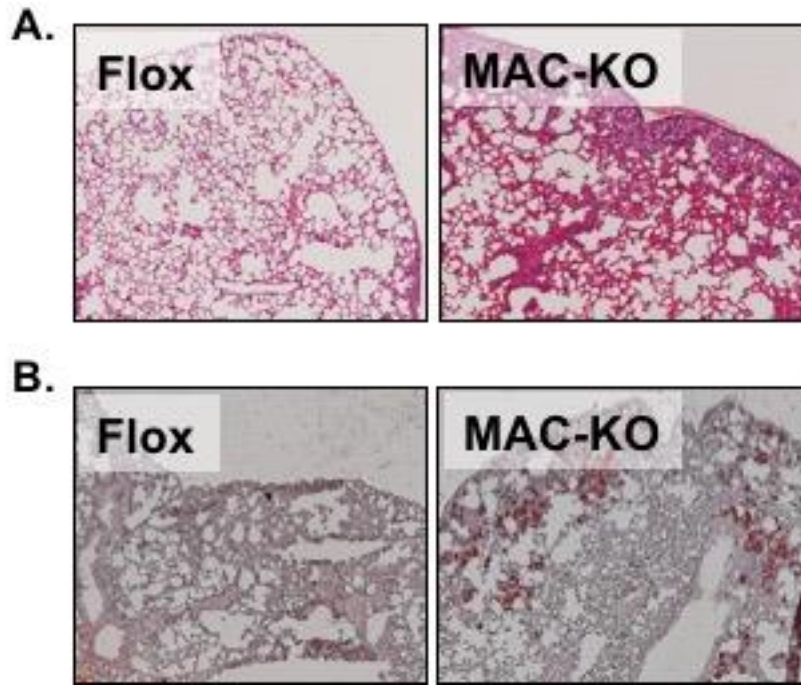

**Supplemental Figure S5.** Frozen lung sections (10  $\mu$ M) from *Abcg1<sup>f/f</sup>* (Flox) and *Abcg1<sup>MAC-KO</sup>* (MAC-KO) mice were stained with hematoxylin and eosin (**A**) or Oil red O (**B**).
